# Supplementary material for: Boosting magnesium storage in MoS2via a 1T phase introduction and interlayer expansion strategy: theoretical prediction and experimental verification
Source: Royal Society of Chemistry journal article supplement (doi:10.1039/d1se01188j), 2021-01-01
Supplement: d1se01188j1.pdf [file d1se01188j1.pdf]

## Supplementary Information

### Boosting magnesium storage in MoS<sub>2</sub> via 1T phase introduction and interlayer expansion strategy: Theoretical prediction and experimental verification

Jingdong Yang<sup>a, b</sup>, Jinxing Wang<sup>a, b\*</sup>, Ling Zhu<sup>c</sup>, Xiao Wang<sup>a, b</sup>, Xiaoyang Dong<sup>a, b</sup>, Wen Zeng<sup>a, b</sup>, Jingfeng

Wang<sup>a, b</sup>, Fusheng Pan<sup>a, b</sup>

<sup>a</sup> School of Materials Science and Engineering, Chongqing University, Chongqing 400030, China

<sup>b</sup> National Engineering Research Center for Magnesium Alloys, Chongqing University, Chongqing 400030, China

<sup>c</sup> Chongqing College of Mobile Communication, Chongqing 401520, China

\* Corresponding author E-mail: wjx@cqu.edu.cn.

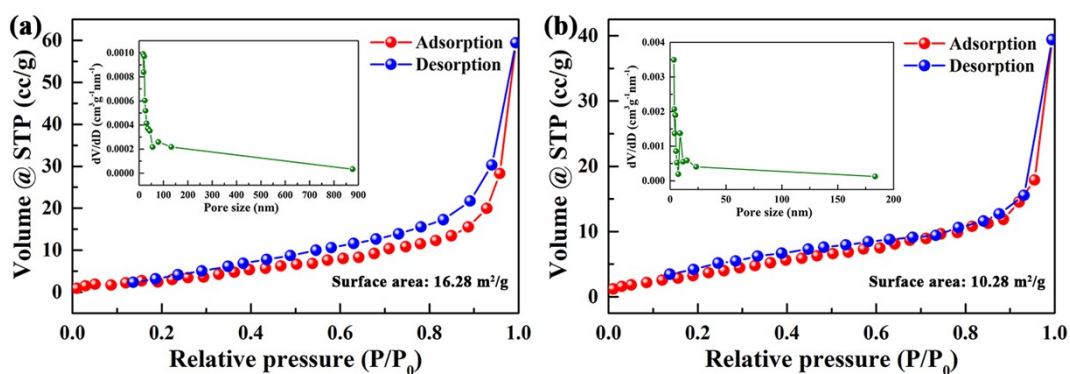

**Fig. S1.** N<sub>2</sub> adsorption–desorption patterns of (a) the interlayer-expanded 1T/2H MoS<sub>2</sub> nanosheets and (b) the pure 2H MoS<sub>2</sub> nanosheets.

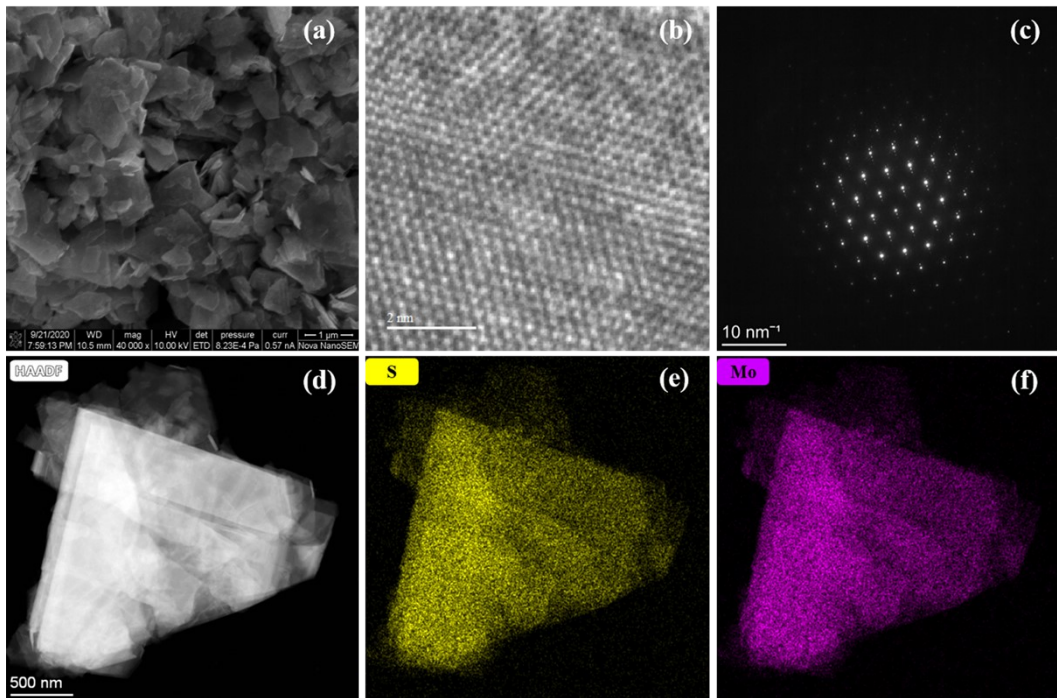

**Fig. S2.** (a) SEM, (b) TEM, (c) SAED patterns, (d) HADDF image and (e-f) EDS mapping of 2H MoS<sub>2</sub> nanosheets.

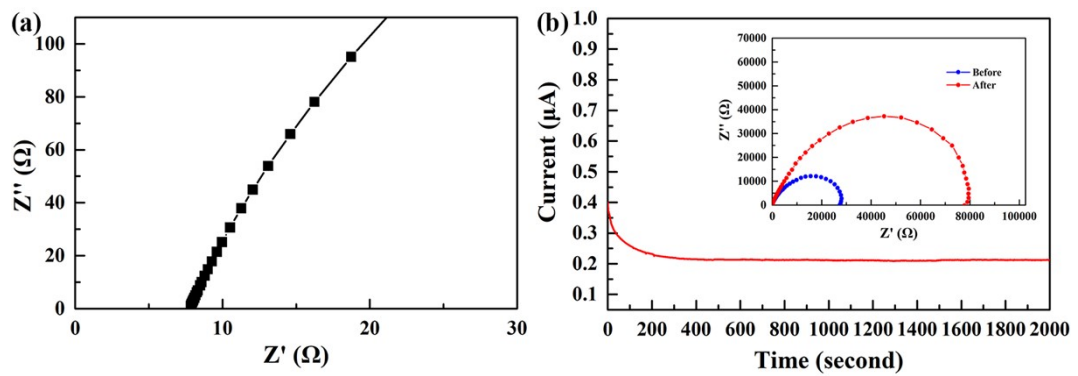

**Fig. S3.** (a) EIS of a SS//0.4 M APC//SS cell using glass fiber separator. (b) The chronoamperometry profiles of Mg//0.4 M APC//Mg cell using glass fiber separator, and the corresponding EISs before and after polarization (shown in insets).

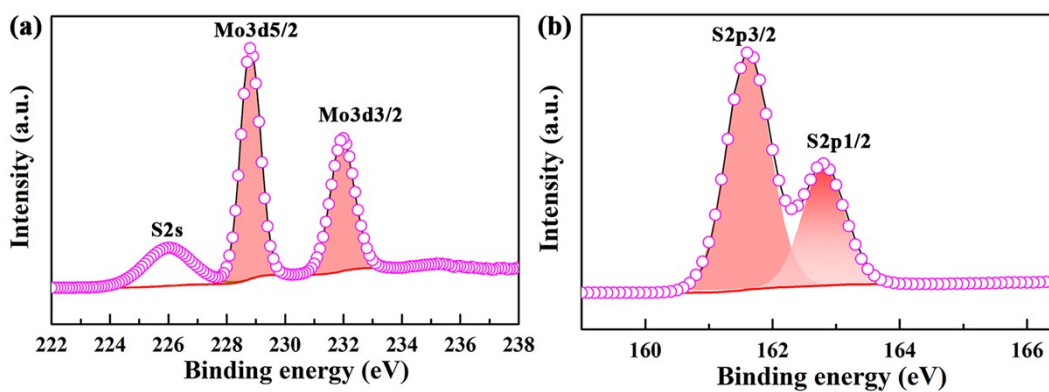

**Fig. S4.** The deconvoluted XPS results of high resolution (a) Mo3d spectrum and (b) S2p spectrum of the synthesized MoS<sub>2</sub> electrode after 50 cycles.

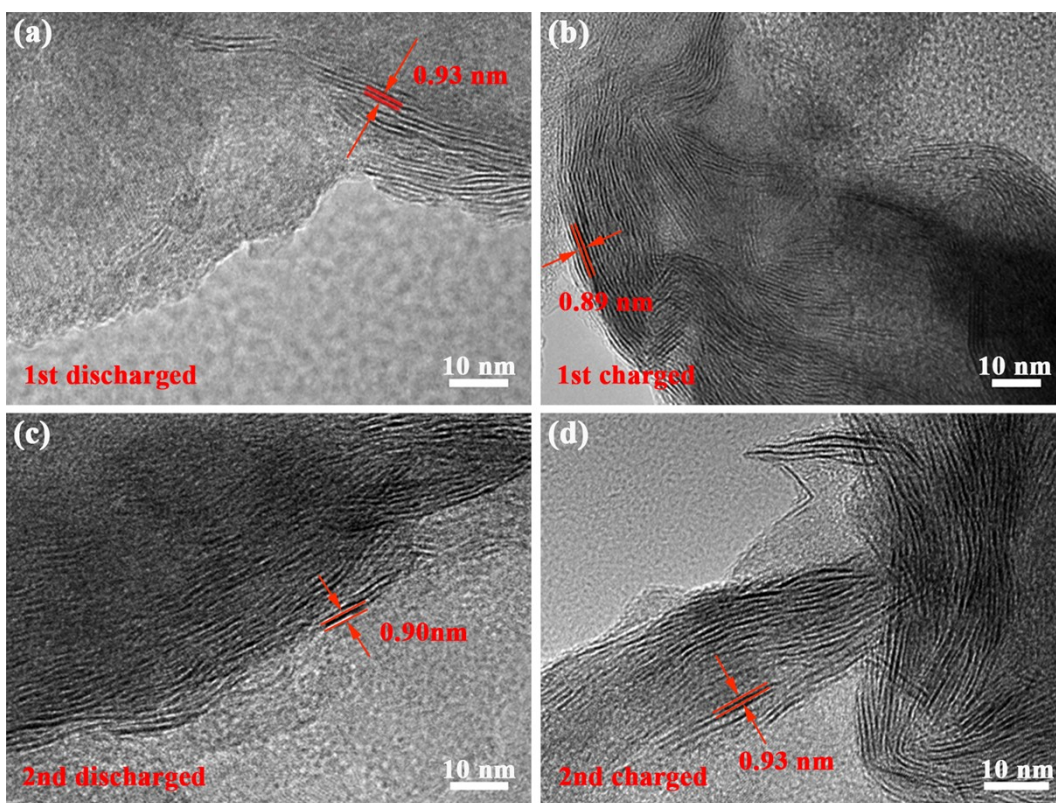

**Fig. S5.** *Ex-situ* HRTEM images of the 1T/2H MoS<sub>2</sub> electrode in MIBs: (a) First discharged sample, (b) First charged state sample, (c) Second discharged sample, (d) Second charged state sample.

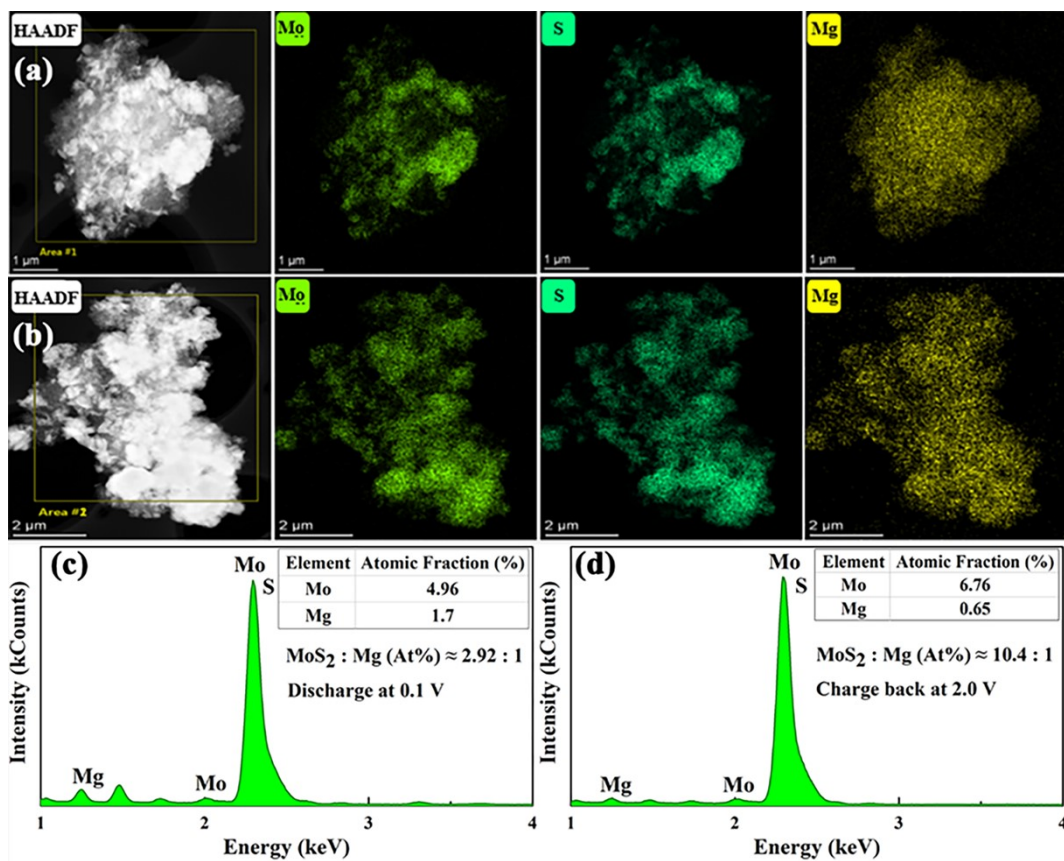

**Fig. S6.** STEM-HAADF image and EDS mapping of (a) discharged 1T/2H MoS<sub>2</sub> electrode and (b) charged 1T/2H MoS<sub>2</sub> electrode. EDS results of 1T/2H MoS<sub>2</sub> electrode in MIBs at (c) discharged stage from area #1 and (d) charged stage from area #2.

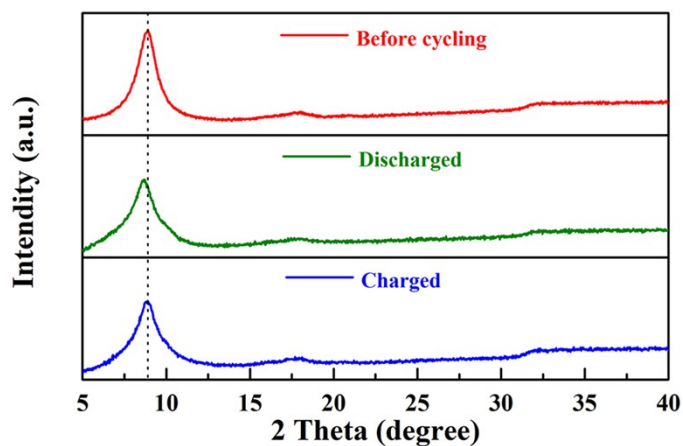

**Fig. S7.** Ex-situ XRD patterns of 1T/2H MoS<sub>2</sub> electrode in RMBS.

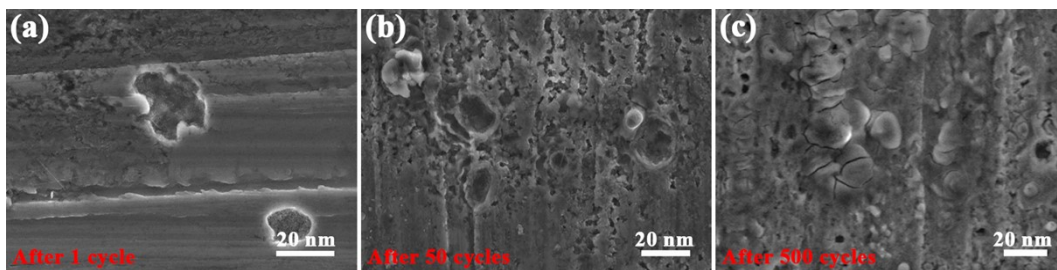

**Fig. S8.** Surface SEM images of the Mg anode after different discharge-charge cycles: (a) 1cycle, (b) 50 cycles, (d) 500 cycles.

**Table S1** The interlayer spacing size of different layered transition metal sulfide for cathode of Mg batteries.

| Candidates                                 | Interlayer spacing size | Ref.      |
|--------------------------------------------|-------------------------|-----------|
| Interlayer expanded 1T/2H MoS <sub>2</sub> | 0.92 nm                 | This work |
| MoS <sub>2</sub>                           | 0.62 nm                 | 66        |
| Interlayer expanded VS <sub>2</sub>        | 1.00 nm                 | 67        |
| VS <sub>2</sub>                            | 0.57 nm                 | 65        |
| WS <sub>2</sub>                            | 0.62 nm                 | 70        |
| TiS <sub>2</sub>                           | 0.57 nm                 | 68        |
| FePS <sub>3</sub>                          | 0.64 nm                 | 69        |
